# Supplementary material for: Electroformation of Giant Vesicles on Indium Tin Oxide (ITO)-Coated Poly(ethylene terephthalate) (PET) Electrodes
Source: MDPI journal article supplement (doi:10.3390/membranes1020109), 2011-05-26
Supplement: s1 [file s1]

## Supplementary Materials

*Fluctuation of membranous objects in the early stage of electroswelling with static dc voltage.*

**Figure S1.** Fluctuation of membranous objects under static dc voltage (3.0 V). The pictures were taken every 30 sec starting from 2 min after the application of the voltage. The length across the frame is 120  $\mu\text{m}$ .

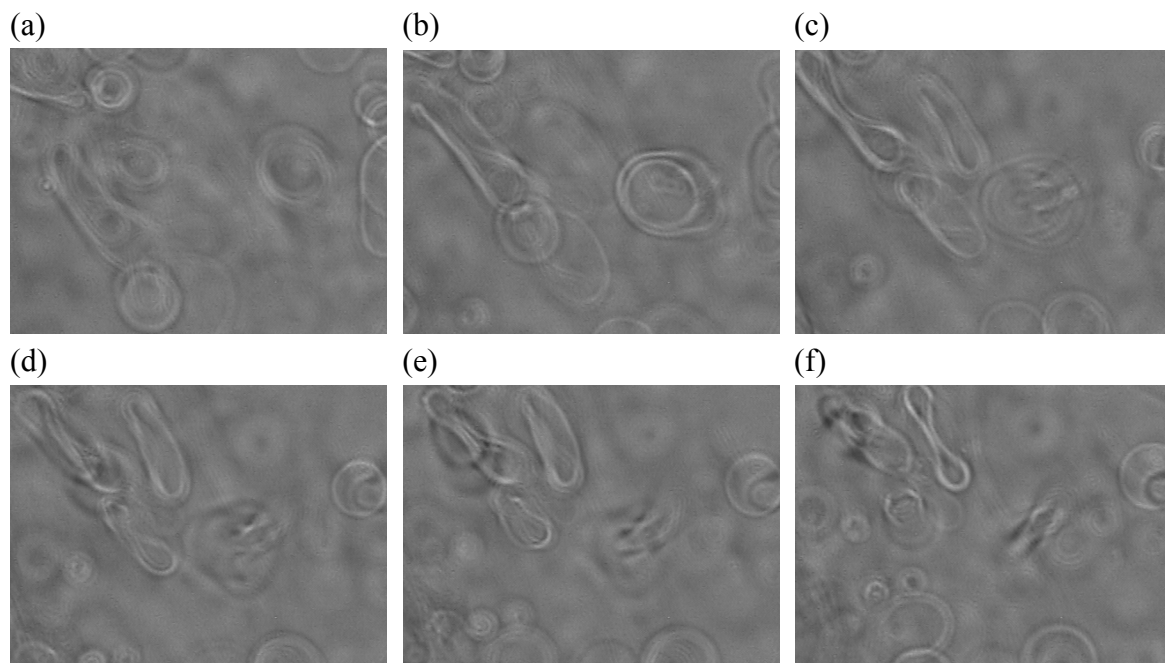

*The prices of ITO-PET and ITO-glass.*

As of May 11, 2011, Aldrich (<http://www.sigmaaldrich.com/>) lists the following prices for ITO-PET sheets and ITO-glass plates.

ITO-PET sheets (639281-5ea, 1ft x 1ft, 100 ohm): \$78.10/5 sheets

ITO-glass plates (703176-10pak 25 x 25 mm, 70-100 ohm): \$35.20/10 plates

In general, ITO-coated materials with lower electric conductivity are less expensive and used in this comparison. The costs can be calculated as  $\$0.017/\text{cm}^2$  and  $\$0.56/\text{cm}^2$ , for the ITO-PET and ITO-glass, respectively. Although the prices should be different depending on the sources of the materials, in this example, ITO-PET costs approximately 30 times less than ITO-glass.
